# Supplementary material for: Are Hox Genes Ancestrally Involved in Axial Patterning? Evidence from the Hydrozoan Clytia hemisphaerica (Cnidaria)
Source: PubMed Central journal article supplement (PMC2626245; doi:10.1371/journal.pone.0004231), 2009-01-21
Supplement: pone.0004231.s003.pdf [file pone.0004231.s003.pdf]

| <b>Species</b>                  | <b>Gene</b> | <b>Accession</b> |
|---------------------------------|-------------|------------------|
| <i>Acropora formosa</i>         | AfoAntpC    | S36771           |
| <i>Acropora millepora</i>       | AmiCnox2    | AAK28380.1       |
| <i>Amphimedon queenslandica</i> | AquBarH     | ACC76765.1       |
|                                 | AquBshl     | ACA04743.1       |
|                                 | AquHex      | ACC76761.1       |
|                                 | AquMsx      | ACC76762.1       |
|                                 | AquNK2      | ACA04745.1       |
|                                 | AquNK5a     | ACC76764.1       |
|                                 | AquNK5b     | ACC76763.1       |
|                                 | AquTlxl     | ACA04744.1       |
| <i>Branchiostoma floridae</i>   | BflCdx      | AAC39017.1       |
|                                 | BflDII      | P53772.1         |
|                                 | BflEmxA     | AAK93792.1       |
|                                 | BflEn       | AAB40144.1       |
|                                 | BflEvxA     | AF374191_1       |
|                                 | BflEvxB     | AF374192_1       |
|                                 | BflGbx      | ABD85192.1       |
|                                 | BflGsx      | AAC39015.1       |
|                                 | BflHox1     | CAA84514.1       |
|                                 | BflHox10    | CAA84522.1       |
|                                 | BflHox11    | AAF81909.1       |
|                                 | BflHox12    | AAF81903.1       |
|                                 | BflHox13    | AF276815_1       |
|                                 | BflHox14    | AAF81905.1       |
|                                 | BflHox2     | BAA78621.1       |
|                                 | BflHox3     | CAA48180.1       |
|                                 | BflHox4     | BAA78622.1       |
|                                 | BflHox5     | CAA84517.1       |
|                                 | BflHox6     | ABX39490.1       |
|                                 | BflHox7     | ABX39491.1       |
|                                 | BflHox8     | ABX39492.1       |
|                                 | BflHox9     | ABX39493.1       |
|                                 | BflHx       | AF303216_1       |
|                                 | BflMnx      | AF308821_1       |
|                                 | BflMox      | AF490355_1       |
|                                 | BflMsx      | CAA10201.1       |
|                                 | BflNK1b     | CAD83854.1       |
|                                 | BflNK2      | AF482469_1       |
|                                 | BflNK2b     | AAD01958.1       |
|                                 | BflNKx2     | AAC35350.1       |
|                                 | BflTlx      | CAD83853.1       |
|                                 | BflVent     | AF303217_1       |
|                                 | BflXlox     | AAC39016.1       |
| <i>Clytia hemisphaerica</i>     | CheCdx      | FJ392842         |
|                                 | CheDII1     | FJ392843         |
|                                 | CheDII2     | FJ392844         |
|                                 | CheEve      | FJ392845         |
|                                 | CheGsx      | FJ392846         |
|                                 | CheHD01     | FJ392847         |
|                                 | CheHD02     | FJ392848         |
|                                 | CheHox1     | FJ392849         |
|                                 | CheHox9-14A | FJ392850         |
|                                 | CheHox9-14B | FJ392851         |

|                                |             |                |
|--------------------------------|-------------|----------------|
|                                | CheHox9-14C | FJ392852       |
|                                | CheMox      | FJ392853       |
|                                | CheNK2a     | FJ392854       |
|                                | CheNK2b     | FJ392855       |
|                                | CheNK2c     | FJ392856       |
|                                | CheNK2d     | FJ392857       |
| <i>Cupiennus salei</i>         | CsaHox3     | AJ005643.1     |
| <i>Capitella sp.</i>           | CspXlox     | AAZ95509.1     |
| <i>Hydra viridis</i>           | CviCnox1    | CAA45908.1     |
|                                | CviCnox2    | CAI38829.1     |
|                                | CviCnox3    | CAA45910.1     |
| <i>Cassiopea xamachana</i>     | CxaScox1    | AF124591_1     |
|                                | CxaScox2    | AF124592_1     |
|                                | CxaScox3    | AF124593_1     |
|                                | CxaScox4    | AF124594_1     |
|                                | CxaScox5    | AF124595_1     |
| <i>Drosophila melanogaster</i> | DmeAbdA     | P29555         |
|                                | DmeAbdB     | P09087         |
|                                | DmeAntp     | P02833         |
|                                | DmeBap      | P22809         |
|                                | DmeBarh1    | Q24255         |
|                                | DmeBsh      | Q04787         |
|                                | DmeBtn      | AAF56025.1     |
|                                | DmeHox11    | XP_001993871.1 |
|                                | DmeCad      | P09085         |
|                                | DmeCG15696  | DQ138716.1     |
|                                | DmeCG18599  | NM_142444.1    |
|                                | DmeCG7056   | NM_142681.1    |
|                                | DmeDfd      | P07548         |
|                                | DmeDll      | P20009         |
|                                | DmeEms      | P18488         |
|                                | DmeEn       | P02836         |
|                                | DmeEve      | P06602         |
|                                | DmeExex     | NM_139907.2    |
|                                | DmeH2       | P10035         |
|                                | DmeHgtx     | NM_144357.2    |
|                                | DmeInd      | NM_206365.1    |
|                                | DmeLab      | P10105         |
|                                | DmeLbe      | NM_079711.2    |
|                                | DmeMsh      | Q03372         |
|                                | DmeVnd      | P22808         |
|                                | DmeNK7      | NM_169580.1    |
|                                | DmePb       | P31264         |
|                                | DmeRo       | P10181         |
|                                | DmeScr      | P09077         |
|                                | DmeSlou     | P22807         |
|                                | DmeTin      | P22711         |
|                                | DmeUbx      | P83949         |
|                                | DmeUnpg     | NM_057798.2    |
| <i>Eleutheria dichotoma</i>    | EdiCnox1    | ABE68629.1     |
|                                | EdiCnox2    | AAB20573       |
|                                | EdiCnox3    | AAB48008.1     |
|                                | EdiCnox4    | ABE68631.1     |
|                                | EdiCnox5    | AAB48010.1     |

|                                    |             |                       |
|------------------------------------|-------------|-----------------------|
| <i>Euprymna scolopes</i>           | EscXlox     | ABD16192.1            |
| <i>Gallus gallus</i>               | GgaCnot     | AAB00687.1            |
| <i>Hydra magnipapillata</i>        | HmaCnox1    | CAB88385.1            |
|                                    | HmaCnox2    | AJ277388.1            |
|                                    | HmaCnox4    | pirS39067             |
|                                    | HmaCnox5    | Z22640                |
|                                    | HmaHoxb     | Chourrout et al. 2006 |
|                                    | HmaHoxc2    | Chourrout et al. 2006 |
|                                    | HmaHoxc3    | Chourrout et al. 2006 |
|                                    | HmaHoxd     | Chourrout et al. 2006 |
| <i>Haliotis rufescens</i>          | HruMox      | CAA53027.1            |
| <i>Hydractinia symbioloncarpus</i> | HsyCnox2    | ABC00746.1            |
|                                    | HsyEmx      | CAA72534.1            |
| <i>Hydra vulgaris</i>              | HvuCnox1    | CAB88384.1            |
|                                    | HvuCnox2    | CAB87555.1            |
|                                    | HvuCnox3    | CAB88385.1            |
| <i>Mnemiopsis leidyi</i>           | MleBarH     | ACD85818.1            |
|                                    | MleBsh      | ACD85817.1            |
|                                    | MleDlx      | ACD85819.1            |
|                                    | MleTlx      | ACD85820.1            |
| <i>Metridium senile</i>            | MseAnthox6  | AY096246.1            |
| <i>Mus musculus</i>                | MusBarHl1   | P63157                |
|                                    | MusBarx1    | Q9ER42                |
|                                    | MusBsh      | NM_178245.3           |
|                                    | MusHhex     | P43120                |
|                                    | MusHlx      | Q61670                |
|                                    | MusHmx      | P43687                |
|                                    | MusLbx      | P52955                |
|                                    | MusNanog    | XM_001471588.1        |
|                                    | MusNK3      | NM_010921.3           |
|                                    | MusNK6      | XM_001474383.1        |
|                                    | MusVax      | Q9WTP9                |
| <i>Nereis virens</i>               | NerCdx      | AAN11403.2            |
|                                    | NerDfd      | AAD46169.2            |
|                                    | NerHox3     | AAD46168.1            |
|                                    | NerLab      | AAD46166.2            |
|                                    | NerLox2     | AAD46171.2            |
|                                    | NerLox4     | AF151669              |
|                                    | NerLox5     | AAD46174.2            |
|                                    | NerPb       | AAD46167.2            |
|                                    | NerPost1    | AAD46175.1            |
|                                    | NerPost2    | AAD46176.2            |
|                                    | NerScr      | AF151667              |
| <i>Nematostella vectensis</i>      | NveAnthox1  | DQ206287.1            |
|                                    | NveAnthox1a | DQ206337.1            |
|                                    | NveAnthox6  | DQ206301.1            |
|                                    | NveAnthox6a | DQ206321.1            |
|                                    | NveAnthox7  | DQ206311.1            |
|                                    | NveAnthox8a | DQ206299.1            |
|                                    | NveAnthox8b | DQ315389.1            |
|                                    | NveAnthox9  | DQ206290.1            |
|                                    | NveDLX      | DQ206283.1            |
|                                    | NveEMXa     | DQ206302.1            |
|                                    | NveEMXLX    | DQ206278.1            |
| NveEvx                             | DQ206338.1  |                       |

|           |            |
|-----------|------------|
| NveGBX    | DQ206305.1 |
| NveGSX    | DQ206295.1 |
| NveHHEX   | DQ206317.1 |
| NveHLXa   | DQ206331.1 |
| NveHLXb   | DQ206303.1 |
| NveHLXB9  | DQ206324.1 |
| NveHLXc   | DQ206333.1 |
| NveHLXd   | DQ206343.1 |
| NveHLXe   | DQ206282.1 |
| NveHLXf   | DQ206318.1 |
| NveHLXg   | DQ206314.1 |
| NveHmx    | DQ206341.1 |
| NveLBX    | DQ206291.1 |
| NveMOXa   | DQ206313.1 |
| NveMOXb   | DQ206339.1 |
| NveMOXc   | DQ206306.1 |
| NveMOXd   | DQ206342.1 |
| NveMSX    | DQ206296.1 |
| NveMSXLXa | DQ206269.1 |
| NveNK2a   | DQ206320.1 |
| NveNK2b   | DQ206262.1 |
| NveNK2c   | DQ206270.1 |
| NveNK2d   | DQ206285.1 |
| NveNK2e   | DQ206310.1 |
| NveNK3    | DQ206336.1 |
| NveNK6    | DQ206340.1 |
| NveNK7    | DQ206276.1 |
| NveRO     | DQ206293.1 |
| NveSLOU   | DQ206255.1 |
| NveVAX    | DQ206277.1 |
| NVHD004   | DQ206223.1 |
| NVHD009   | DQ206261.1 |
| NVHD010   | DQ206300.1 |
| NVHD017   | DQ206304.1 |
| NVHD024   | DQ206224.1 |
| NVHD027   | DQ206263.1 |
| NVHD032   | DQ206266.1 |
| NVHD033   | DQ206312.1 |
| NVHD042   | DQ206315.1 |
| NVHD043   | DQ206268.1 |
| NVHD050   | DQ206319.1 |
| NVHD054   | DQ206272.1 |
| NVHD056   | DQ206274.1 |
| NVHD065   | DQ301955.1 |
| NVHD067   | DQ206323.1 |
| NVHD071   | DQ206325.1 |
| NVHD076   | DQ206328.1 |
| NVHD077   | DQ206329.1 |
| NVHD081   | DQ206330.1 |
| NVHD083   | DQ206279.1 |
| NVHD096   | DQ206334.1 |
| NVHD102   | DQ206284.1 |
| NVHD115   | DQ206289.1 |
| NVHD145   | DQ206346.1 |
| NVHD147   | DQ206297.1 |

|                             |          |                |
|-----------------------------|----------|----------------|
|                             | NVHD41   | DQ206267.1     |
| <i>Podocoryne carnea</i>    | PcaCnox1 | CAA57211.1     |
|                             | PcaCnox2 | BAA94091.1     |
|                             | PcaCnox4 | AAK63185.1     |
|                             | PcaGsx   | AAG09805.1     |
| <i>Trichoplax adhaerens</i> | TadDlx   | ACH57166.1     |
|                             | TadHmx   | ACH57163.1     |
|                             | TadMnx   | ACH57159.1     |
|                             | TadNot   | ACH57165.1     |
|                             | Trox2    | XP_002118201.1 |
